# Supplementary material for: Based on network pharmacology and molecular docking to predict the mechanism of Huangqi in the treatment of castration-resistant prostate cancer
Source: PLoS One. 2022 May 20;17(5):e0263291. doi: 10.1371/journal.pone.0263291 (PMC9122509; doi:10.1371/journal.pone.0263291)
Supplement: S1 File — (XLSX) [file pone.0263291.s001.xlsx]

## Sheet: Sheet1
MOL000442	PTGS2		200424053451
MOL000442	HSP90AA1		1587730600Cj
MOL000433	CDK2
MOL000422	VCAM1
MOL000422	PTGS2
MOL000422	PPARG
MOL000422	PGR
MOL000422	JUN
MOL000422	HSP90AA1
MOL000422	GSTP1
MOL000422	CYP3A4
MOL000422	CYP1A2
MOL000422	BCL2
MOL000422	AR
MOL000422	AKR1C3
MOL000422	AHR
MOL000417	PTGS2
MOL000417	PPARG
MOL000417	HSP90AA1
MOL000417	ESR2
MOL000417	ESR1
MOL000417	CDK2
MOL000417	CCNA2
MOL000417	AR
MOL000392	PTGS2
MOL000392	PPARG
MOL000392	JUN
MOL000392	HSP90AA1
MOL000392	ESR2
MOL000392	ESR1
MOL000392	CDK2
MOL000392	CCNA2
MOL000392	AR
MOL000387	PTGS2
MOL000387	MET
MOL000387	KDR
MOL000387	HSP90AA1
MOL000380	PTGS2
MOL000380	NCOA1
MOL000380	HSP90AA1
MOL000380	ESR1
MOL000379	PTGS2
MOL000378	PTGS2
MOL000378	PPARG
MOL000378	HSP90AA1
MOL000378	ESR2
MOL000378	ESR1
MOL000378	CDK2
MOL000378	CCNA2
MOL000378	AR
MOL000371	PTGS2
MOL000371	ESR1
MOL000354	PTGS2
MOL000354	PPARG
MOL000354	NCOA1
MOL000354	HSP90AA1
MOL000354	ESR2
MOL000354	ESR1
MOL000354	CDK2
MOL000354	CCNA2
MOL000354	AR
MOL000296	PTGS2
MOL000296	PGR
MOL000239	PTGS2
MOL000239	HSP90AA1
MOL000239	ESR2
MOL000239	CDK2
MOL000239	AR
MOL000211	PGR
MOL000098	VEGFA
MOL000098	VCAM1
MOL000098	TP53
MOL000098	RB1
MOL000098	PTGS2
MOL000098	PPARG
MOL000098	NQO1
MOL000098	MMP2
MOL000098	MAPK1
MOL000098	JUN
MOL000098	IL6
MOL000098	IL1B
MOL000098	HSPA5
MOL000098	HSP90AA1
MOL000098	GSTP1
MOL000098	F3
MOL000098	EGFR
MOL000098	EGF
MOL000098	CYP3A4
MOL000098	CYP1A2
MOL000098	CCL2
MOL000098	BCL2
MOL000098	AR
MOL000098	AHR
MOL000033	PGR

## Sheet: Sheet2
		target name
MOL000211	Mairin	Progesterone receptor		456.78	6.52	2	3	55.38	0.73	0.22	0.78	0.26	8.87
MOL000442	1,7-Dihydroxy-3,9-dimethoxy pterocarpene	Prostaglandin G/H synthase 2 Retinoic acid receptor RXR-alpha Heat shock protein HSP 90 Trypsin-1		314.31	3.11	2	6	39.05	0.89	-0.04	0.48	0	7.95
MOL000439	isomucronulatol-7,2'-di-O-glucosiole	DNA topoisomerase II		626.67	-0.68	8	15	49.28	-2.22	-3.36	0.62	0	0.93
MOL000438	(3R)-3-(2-hydroxy-3,4-dimethoxyphenyl)chroman-7-ol			302.35	3.13	2	5	67.67	0.96	0.34	0.26	0	2.9
MOL000433	FA	Cell division protein kinase 2 Thrombin Glycogen synthase kinase-3 beta		441.45	0.01	7	13	68.96	-1.5	-2.59	0.71	0	24.81
MOL000422	kaempferol	Nitric oxide synthase, inducible DrugBank Prostaglandin G/H synthase 1 DrugBank Androgen receptor DrugBank Peroxisome proliferator activated receptor gamma DrugBank Prostaglandin G/H synthase 2 DrugBank Heat shock protein HSP 90 DrugBank Phosphatidylinositol-4,5-bisphosphate 3-kinase catalytic subunit, gamma isoform DrugBank mRNA of PKA Catalytic Subunit C-alpha DrugBank Nuclear receptor coactiva…		286.25	1.77	4	6	41.88	0.26	-0.55	0.24	0	14.74
MOL000417	Calycosin			284.28	2.32	2	5	47.75	0.52	-0.43	0.24	0	17.1
MOL000398	isoflavanone			316.33	2.42	2	6	109.99	0.53	0.17	0.3	0	15.51
MOL000392	formononetin			268.28	2.58	1	4	69.67	0.78	0.02	0.21	0	17.04
MOL000387	Bifendate			418.38	2.56	0	10	31.1	0.15	-0.06	0.67	0	17.96
MOL000380	(6aR,11aR)-9,10-dimethoxy-6a,11a-dihydro-6H-benzofurano[3,2-c]chromen-3-ol			300.33	2.64	1	5	64.26	0.93	0.55	0.42	0	8.49
MOL000379	9,10-dimethoxypterocarpan-3-O-β-D-glucoside			462.49	0.74	4	10	36.74	-0.63	-1.5	0.92	0	13.06
MOL000378	7-O-methylisomucronulatol			316.38	3.38	1	5	74.69	1.08	0.84	0.3	0	2.98
MOL000374	5'-hydroxyiso-muronulatol-2',5'-di-O-glucoside			642.67	-0.95	9	16	41.72	-2.47	-3.62	0.69	0	2.52
MOL000371	3,9-di-O-methylnissolin			314.36	2.89	0	5	53.74	1.18	0.63	0.48	0	9
MOL000354	isorhamnetin			316.28	1.76	4	7	49.6	0.31	-0.54	0.31	0.32	14.34
MOL000296	hederagenin			414.79	8.08	1	1	36.91	1.32	0.96	0.75	0	5.35
MOL000239	Jaranol			314.31	2.09	2	6	50.83	0.61	-0.22	0.29	0.29	15.5
MOL000098	quercetin			302.25	1.5	5	7	46.43	0.05	-0.77	0.28	0.38	14.4
MOL000033	(3S,8S,9S,10R,13R,14S,17R)-10,13-dimethyl-17-[(2R,5S)-5-propan-2-yloctan-2-yl]-2,3,4,7,8,9,11,12,14,15,16,17-dodecahydro-1H-cyclopenta[a]phenanthren-3-ol			428.82	8.54	1	1	36.23	1.45	1.09	0.78	0	5.22
